# Supplementary material for: Ca2+-induced self-assembly of Bombyx mori silk sericin into a nanofibrous network-like protein matrix for directing controlled nucleation of hydroxylapatite nano-needles
Source: Royal Society of Chemistry journal article supplement (doi:10.1039/c4tb01944j), 2015-01-01
Supplement: c4tb01944j1.pdf [file c4tb01944j1.pdf]

### Supplementary material:

Ca<sup>2+</sup>-induced Self-Assembly of *Bombyx mori* Silk Sericin into A Nanofibrous Network-like Protein Matrix for Directing controlled nucleation of Hydroxylapatite Nano-Needles

Mingying Yang,<sup>\*a</sup> Guanshan Zhou,<sup>a</sup> Yajun Shuai,<sup>a</sup> Jie Wang,<sup>a</sup> Liangjun Zhu,<sup>a</sup> and Chuanbin Mao<sup>\*b</sup>

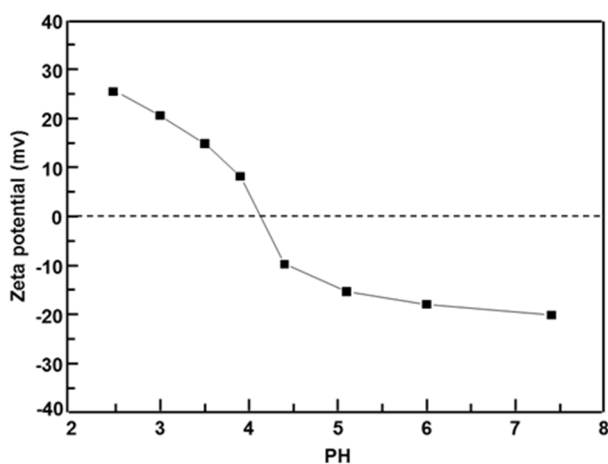

**Figure S1.** Zeta potential as a function of the pH values for aqueous *BS* solution at 0.01 M ionic strength (1 mM KCl). The intersection of the horizontal dotted line with the curves depicts the isoelectric point of *BS*.

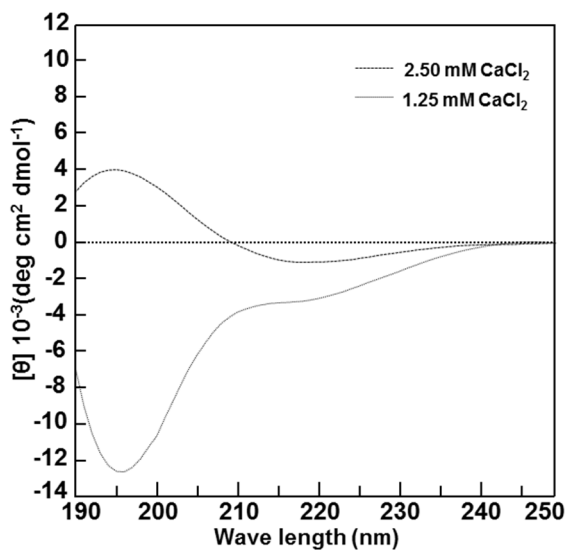

**Figure S2.** CD spectra of aqueous *BS* solution incubated by CaCl<sub>2</sub> with concentration ranged from 1.25 mM to 2.50 mM for 1 day.

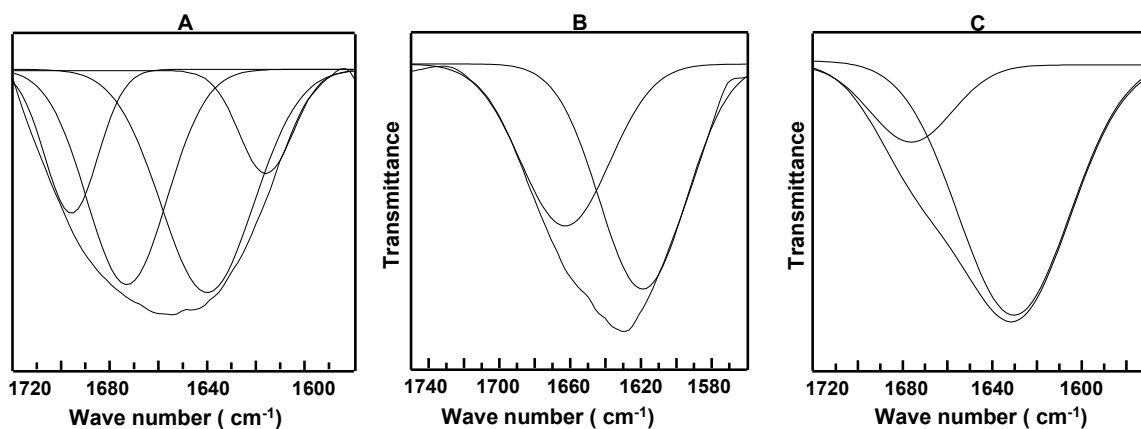

**Figure S3.** The deconvoluted spectra in the amide I region of *BS* before (A) and after mineralized for 3 days (B) and 5 days (C).

**Table S1** The deconvoluted peaks in the amide I region of *BS*, *BS*<sub>3</sub> and *BS*<sub>5</sub>.

|                              | Peak (cm <sup>-1</sup> ) | Secondary structure | Fraction (%) |
|------------------------------|--------------------------|---------------------|--------------|
| <b><i>BS</i></b>             | 1694                     | β-turn              | 15           |
|                              | 1674                     | β-turn              | 35           |
|                              | 1640                     | random coil         | 40           |
|                              | 1616                     | β-sheet             | 10           |
| <b><i>BS</i><sub>3</sub></b> | 1663                     | β-turn              | 45           |
|                              | 1619                     | β-sheet             | 55           |
| <b><i>BS</i><sub>5</sub></b> | 1676                     | β-turn              | 20           |
|                              | 1630                     | β-sheet             | 80           |
